# Supplementary material
Source: PubMed Central journal article supplement (PMC2448846)
Supplement: 0803383105_Supplemental_PDF.pdf [file 0803383105_Supplemental_PDF.pdf]

# Supporting Information

Tarn et al. 10.1073/pnas.0803383105

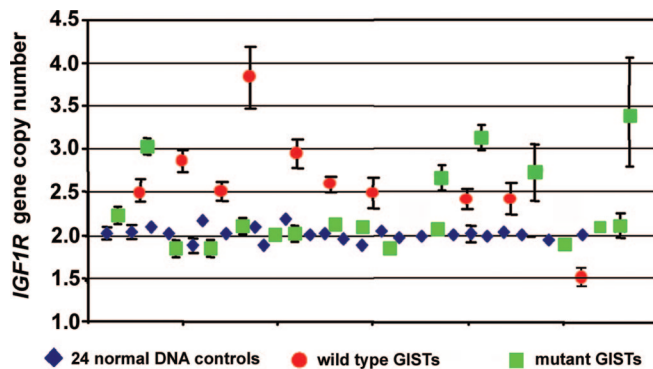

**Fig. S1.** *IGF1R* gene amplification in gastrointestinal stromal tumor (GIST) biopsies. Genomic quantitative PCR (qPCR) analyses of *IGF1R* gene copy in 24 normal samples (blue symbols), 16 mutant clinical GIST samples, and 2 mutant GIST cell lines (green symbols), and in 10 WT GISTs (red symbols) are shown. qRT-PCR for detecting *IGF1R* gene amplification was carried out using custom-designed primers and Fam-labeled probe, which results in an 80-bp PCR product. Normal blood DNAs were either made into 2-fold serial dilutions and used to generate standard curves for *IGF1R* or *RNase P* or used as normal sample controls. Gene copy number was calculated as gene dose according to the linear regression curves derived from standard curves for each gene.

**WT Case 18**

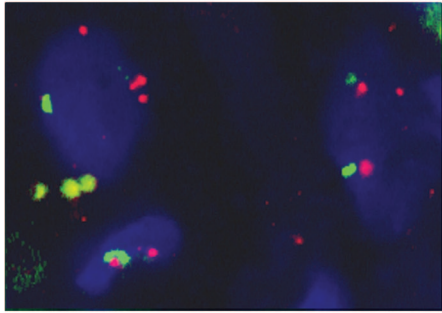

**WT Case 10**

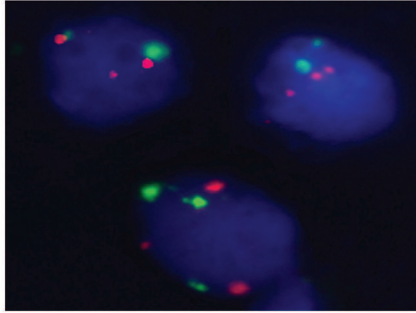

**WT Case 25**

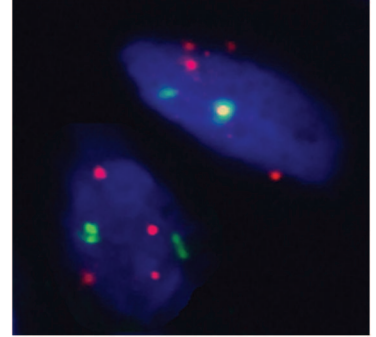

**WT Case 26**

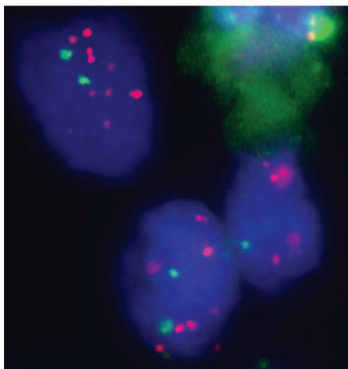

**WT Case 15**

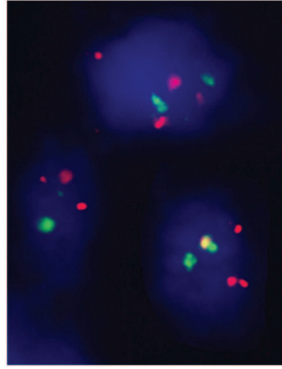

**Pediatric GIST**

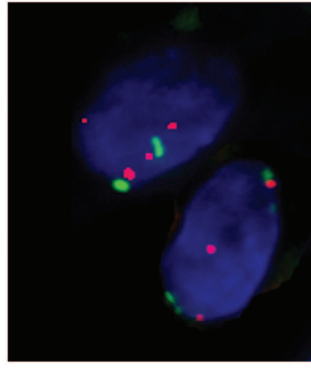

**Normal Stomach**

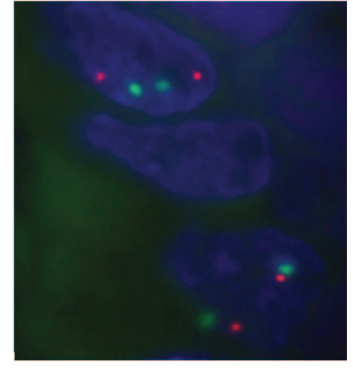

**Fig. S2.** *IGF1R* gene amplification in GIST biopsies. FISH results of five WT GISTs and a pediatric GIST showing *IGF1R* amplification. Normal stomach shows two *IGF1R* copies. Green, *CEP 15* signals; red, *IGF1R* signals. Five-micrometer paraffin-embedded tumor tissue sections were cohybridized with the CEP15 SpectrumGreen probe and the labeled (SpectrumOrange dUTP) RP11-654A15 BAC probe encompassing the *IGF1R* gene. Slides were counterstained with DAPI, and cells were observed using a fluorescence microscope. Images were captured using a CCD camera operated by a Metasystems ISIS FISH imaging system. Quantification of the *IGF1R* and *CEP 15* signals was performed with hematoxylin and eosin staining, and 200 cells were scanned for each slide. Increased copy number was defined as the presence of three or more signals per nucleus.

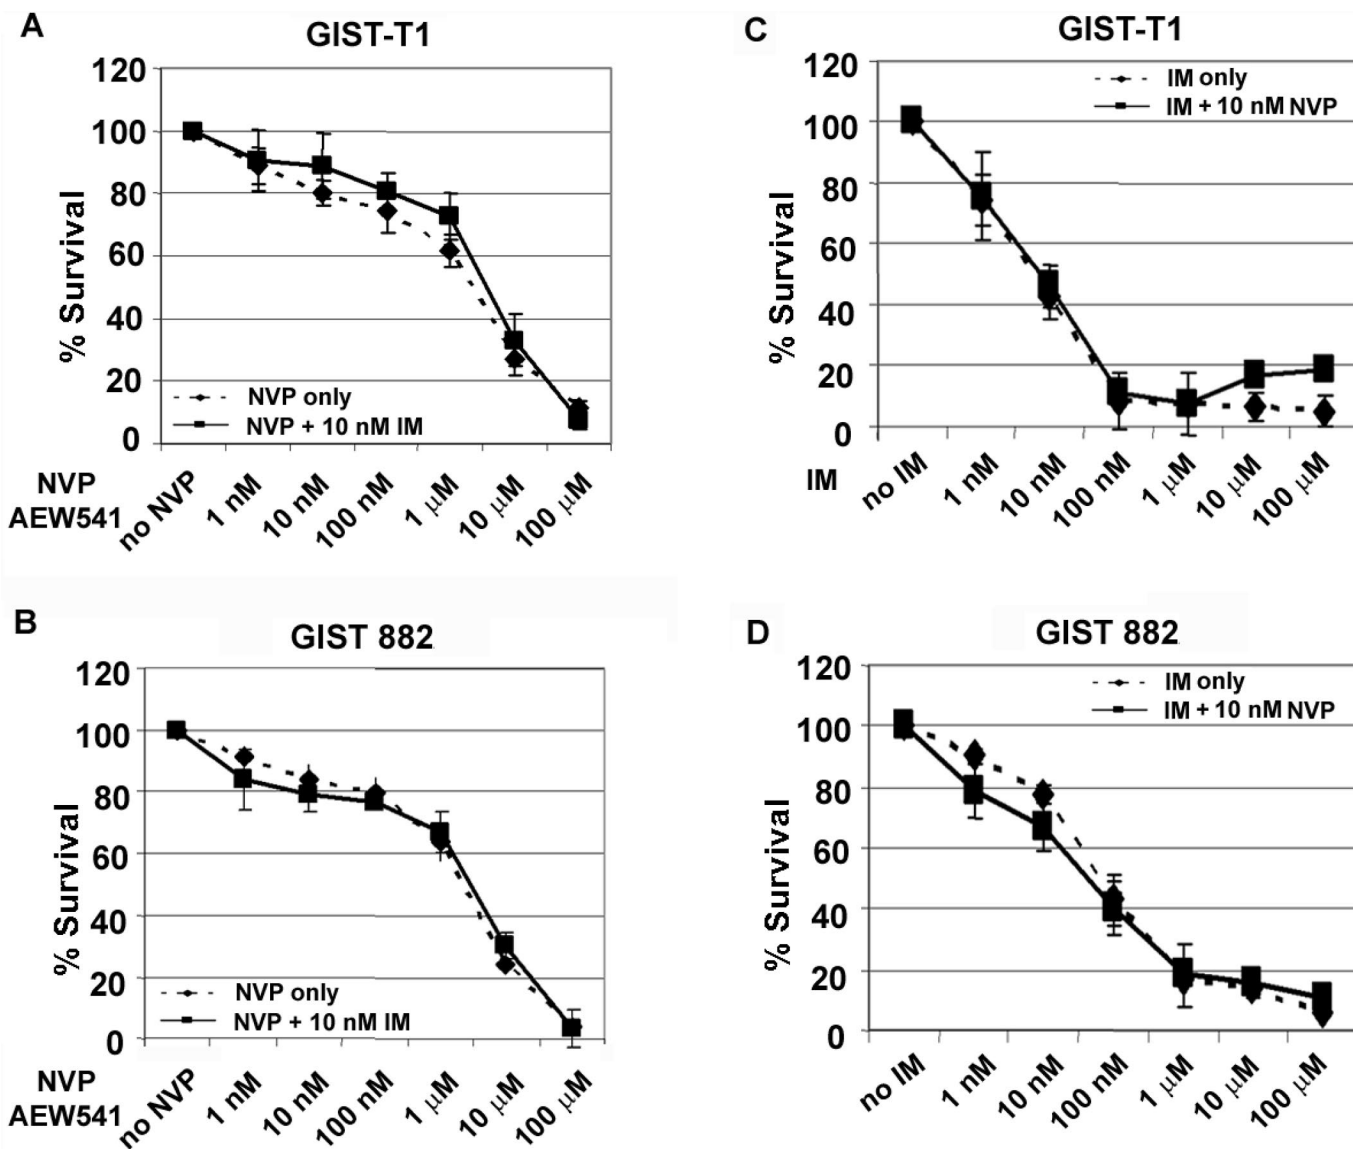

Fig. S3. Cell proliferation/viability assays. (A and B) GIST-T1 and GIST 882 cells were treated with NVP-AEW541 at the indicated concentrations for 72 h followed by WST-1 assays to measure cell viability. Dotted lines and solid lines represent cells treated with NVP alone or treated with NVP plus 10 nM imatinib, respectively. (C and D) GIST-T1 and GIST 882 cells were treated with imatinib at the indicated concentrations for 72 h followed by WST-1 assays. Dotted lines and solid lines represent cells treated with imatinib alone or treated with imatinib plus 10 nM NVP-AEW541, respectively.

## GIST-T1

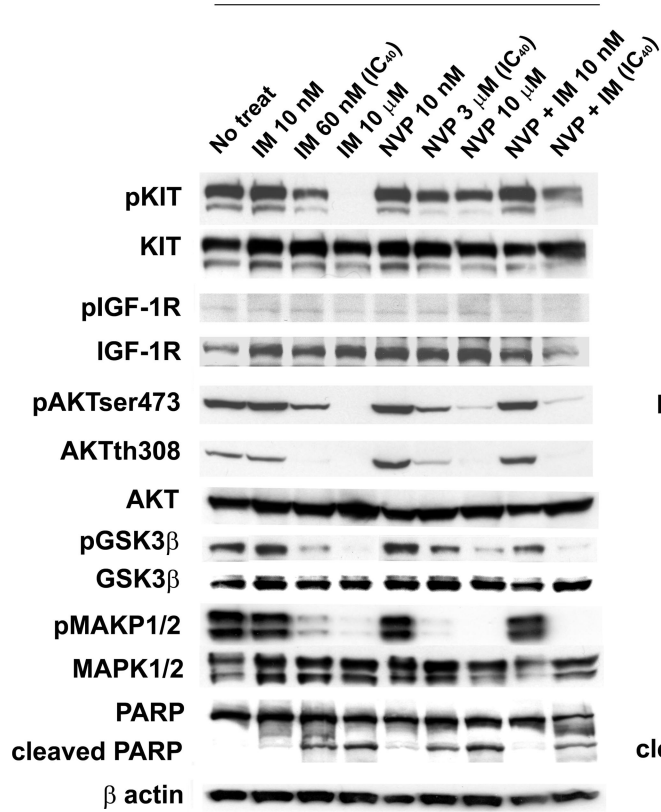

## GIST 882

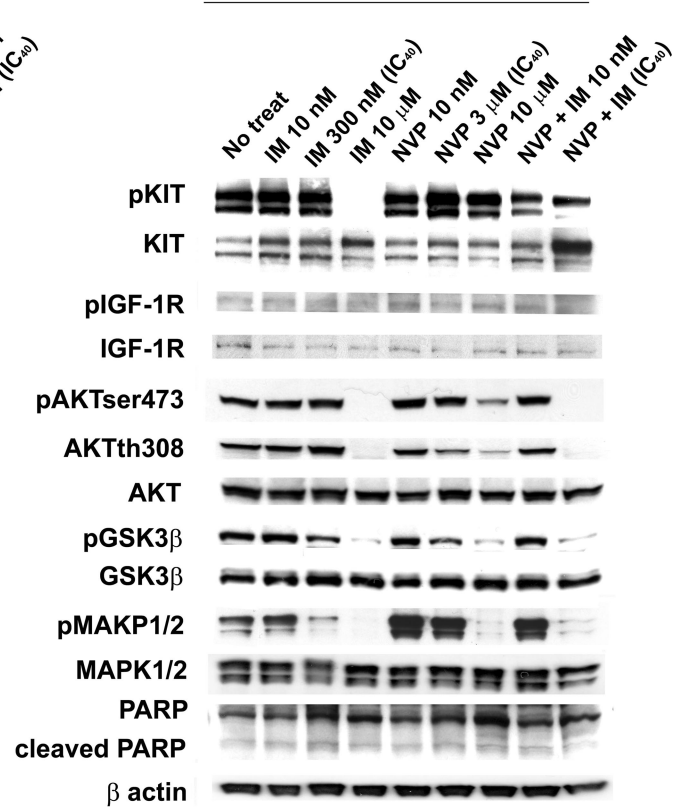

**Fig. S4.** NVP-AEW541 and imatinib have additive effects on IGF1R and KIT signaling. GIST-T1 cells and GIST 882 cells were treated with 10 nM, IC<sub>40</sub>, or 10 μM imatinib or NVP-AEW541; with 10 nM each NVP-AEW541 and imatinib; or with NVP-AEW541 and imatinib at IC<sub>40</sub> concentrations for 6 h. Equal amounts (40 μg) of WCE from each sample were subjected to immunoblotting using specific antibodies as indicated.

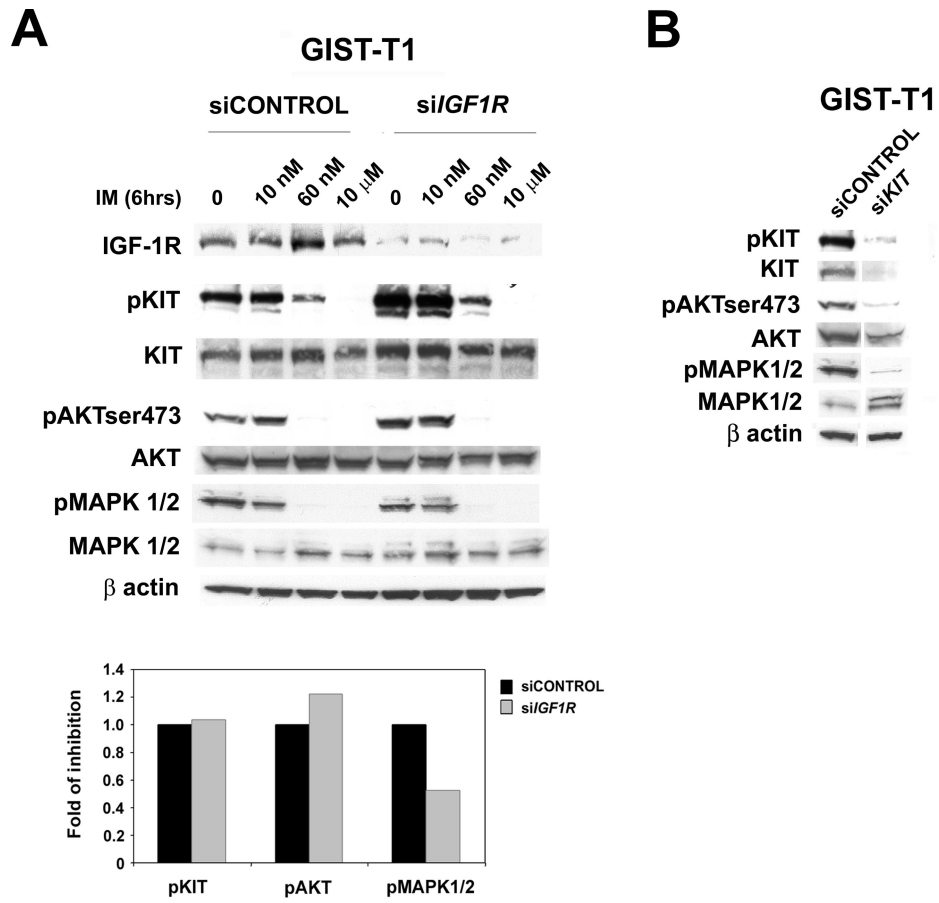

**Fig. 55.** siRNA knockdown of IGF1R and KIT. (A and B) GIST-T1 cells were transfected with siRNA-control, siRNA-KIT, or siRNA-IGF1R for 48-h harvest time followed by immunoblotting with the indicated antibodies. Quantification of the inhibition of downstream effectors in siRNA-control vs. siRNA-IGF1R was measured by densitometry and is represented in bar graphs.

**Table S1. IGF-1R gene copy numbers and expression levels in GISTs**

| Case no.       | IGF-1R copy no. | IGF-1R copy no. (SNP) | Score IGF1R | Score KIT |
|----------------|-----------------|-----------------------|-------------|-----------|
| WT             |                 |                       |             |           |
| 10             | 2.9             | 2.4                   | 3           | 3         |
| 15             | 3               | 3.3                   | 2           | 3         |
| 18             | 2.5             | 3.4                   | 3           | 3         |
| 24             | 1.5             | NA*                   | 2           | 2         |
| 25             | 2.5             | 2.9                   | 3           | 3         |
| 26             | 3.8             | 2.9                   | 2           | 2         |
| 27             | NA              | NA                    | 3           | 3         |
| 28             | NA              | NA                    | 2           | 3         |
| Pediatric      | NA              | NA                    | 3           | 3         |
| Mutant         |                 |                       |             |           |
| 1              | 1.9             | 2.18                  | 2           | 3         |
| 3              | NA              | NA                    | 2           | 3         |
| 4              | 2.0             | 2.78                  | 1           | 3         |
| 5              | 3               | 3.04                  | 1           | 3         |
| 6              | 2.3             | NA                    | 0           | 3         |
| 7              | 2.1             | 2.16                  | 1           | 0         |
| 8              | 2.1             | 2.6                   | 2           | 3         |
| 9 <sup>†</sup> | 3.4             | 3.04                  | 2           | 3         |
| 11             | 2.1             | NA                    | 2           | 3         |
| 13             | 2               | NA                    | 1           | 1         |
| 14             | 2.1             | NA                    | 1           | 3         |
| 16             | 2.1             | NA                    | 2           | 3         |
| 19             | 2.7             | 3.1                   | 1           | 3         |
| 20             | 3.1             | 3.26                  | 1           | 3         |
| 22             | 2.7             | 2.46                  | 2           | 3         |
| 23             | NA              | NA                    | 1           | 2         |

\*NA, not applicable.

<sup>†</sup>Sample with *PFDR* $\alpha$  mutation.

**Table S2. FISH results on WT GIST samples**

| Case no.       |                           |    |    |    |   |     |
|----------------|---------------------------|----|----|----|---|-----|
| WT GIST 18     |                           |    |    |    |   |     |
|                | IGF1R signals per nucleus | 2  | 3  | 4  |   |     |
|                | % cells                   | 56 | 40 | 4  |   |     |
| WT GIST 10     |                           |    |    |    |   |     |
|                | IGF1R signals per nucleus | 2  | 3  | 4  |   |     |
|                | % cells                   | 57 | 39 | 4  |   |     |
| WT GIST 25     |                           |    |    |    |   |     |
|                | IGF1R signals per nucleus | 2  | 3  | 4  | 5 |     |
|                | % cells                   | 47 | 35 | 15 | 3 |     |
| WT GIST 26     |                           |    |    |    |   |     |
|                | IGF1R signals per nucleus | 2  | 3  | 4  | 5 | 6 8 |
|                | % cells                   | 50 | 18 | 26 | 2 | 2 2 |
| WT GIST 15     |                           |    |    |    |   |     |
|                | IGF1R signals per nucleus | 2  | 3  | 4  |   |     |
|                | % cells                   | 55 | 36 | 9  |   |     |
| Pediatric GIST |                           |    |    |    |   |     |
|                | IGF1R signals per nucleus | 2  | 3  | 4  | 5 |     |
|                | % cells                   | 48 | 37 | 11 | 4 |     |

**Table S3. pAKT, pmTOR, pS6 expression levels and clinicopathological features of GISTs**

| Case no.         | Score pAKT | Score pmTOR | Score pS6 | Mutational status          | Site                    | Risk     | Follow-up           | Age/gender |
|------------------|------------|-------------|-----------|----------------------------|-------------------------|----------|---------------------|------------|
| WT               |            |             |           |                            |                         |          |                     |            |
| 10               | 1          | 2           | 3         | WT                         | Stomach                 | High     | NED                 | 33/F       |
| 15               | 2          | 1           | 2         | WT                         | Stomach                 | High     | LTFU, still alive   | 86/M       |
| 18               | 2          | 2           | 2         | WT                         | Stomach                 | High     | 2 mets at dx        | 53/M       |
| 24               | 1          | 2           | 2         | WT                         | Small bowel             | High     | Alive on IM         | 51/M       |
| 25               | 2          | 2           | 2         | WT                         | Rectum                  | High     | Recurred, NED on IM | 48/M       |
| 26               | 1          | 1           | 2         | WT                         | Small bowel             | High     | Mets site           | 48/M       |
| 27               | NA*        | NA          | NA        | WT                         | Multiple sites          | High     | NA                  | 45/F       |
| 28               | NA         | NA          | NA        | WT                         | Small bowel             | High     | NA                  | 57/F       |
| Pediatric Mutant |            |             |           |                            |                         |          |                     |            |
| 1                | NA         | NA          | NA        | WT                         | Stomach                 | High     | NA                  | 12/F       |
| 1                | 2          | 2           | 2         | 9: 74267ins6               | Abdominal wall          | Int      | DOD                 | 43/M       |
| 3                | 3          | 2           | 3         | 11: V559D                  | Stomach                 | Very low | NED                 | 56/F       |
| 4                | 1          | 2           | 1         | 11: V560D                  | 1° Stomach, intraabdom. | High     | DOD                 | 77/M       |
| 5                | 1          | 1           | 1         | 11: 75684del6              | Rectum                  | Int      | NED                 | 63/M       |
| 6                | 0          | 0           | 2         | 11: 75688del3              | Small bowel             | High     | DOD                 | 66/F       |
| 7                | 2          | 1           | 2         | 13: K642E                  | Small bowel             | High     | NED                 | 47/M       |
| 8                | 2          | 3           | 2         | 17: Y823D                  | Stomach                 | High     | LTFU, still alive   | 81/F       |
| 9†               | 1          | 1           | 1         | 14: N659Y; 18: Y849C       | Stomach                 | High     | DOD                 | 71/M       |
| 11               | 2          | 1           | 2         | 9: 74267ins6               | Mes. mets               | High     | DOD                 | 75/F       |
| 13               | 1          | 1           | 2         | 11: V559D                  | Recurrent               | High     | Alive on IM         | 67/F       |
| 14               | 2          | 2           | 2         | 9: 74267ins6               | Small bowel             | High     | DOU                 | 78/M       |
| 16               | 2          | 2           | 2         | 11: delW557_K558           | Stomach                 | Low      | NED                 | 71/F       |
| 19               | 3          | 2           | 2         | 11: V559G                  | Stomach                 | High     | NED                 | 70/F       |
| 20               | 1          | 0           | 1         | 11: 75668del6              | Small bowel             | Low      | NED                 | 66/F       |
| 22               | 1          | 1           | 1         | 11: 75662del24, 75686ins 6 | Omentum/retrop          | High     | DOD                 | 37/M       |
| 23               | 0          | 2           | 2         | 11: 75686del6              | Colon                   | High     | NED                 | 72/F       |

NED, no evidence of disease; DOD, dead of disease; IM, imatinib mesylate; LTFU, lost of follow-up; DOU, dead of unknown cause.

\*NA, not applicable.

†Sample with *PFDRGα* mutation.



**Table S4. Primers used for *IGF1R* mutational analysis**

| Exon | Forward primer                  | Reverse primer                  |
|------|---------------------------------|---------------------------------|
| 15   | 5'- TGAAACTGTTGTAGCGAAGATGAA-3' | 5'- CCCAAATTAGCAACCCTCTGAAA-3'  |
| 16   | 5'- CTGTACCTGCTTTAATTACGG-3'    | 5'- CTCTCCCTGTGCTGCATTTT-3'     |
| 17   | 5'- GCCGCAGCACCCACAGAGACA-3'    | 5'- TGCAGGGAGATTATAAAGGAAAAG-3' |
| 18   | 5'- TGATATGCCAACCTCGAAAGAAAT-3' | 5'- CTAATGCCAACAAAGTCTCAAAA-3'  |
| 19   | 5'- TGCTCCAGCGTGTGACTCT-3'      | 5'- GCTAAAGCTGGCAACGGGTAA-3'    |
| 20   | 5'-TTTCCAAGCTCTCACAG-3'         | 5'-GAATGGCTTTAATCTCCTA-3'       |
